# Supplementary material
Source: Springer Nature journal article supplement (https://www.springermedizin.de/resource/supplementary/12957_2012_1048_MOESM1_ESM.pdf/9562224)

□ Con    ▨ L-Gln(+)    ▩ L-Arg(+)    ▪ L-Ala

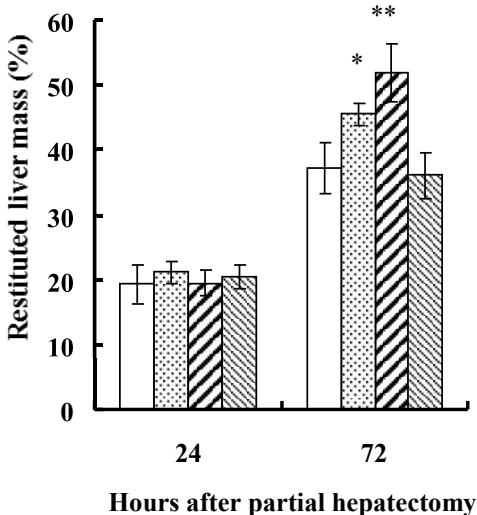

Supplement: MOESM1 [file 9562224]
